# Supplementary material
Source: ML conference proceedings conference paper supplement (https://openreview.net/forum?id=Dxl0EuFjlf)
Supplement: supplementary_material [file attachment]

## A IMPLEMENTATION DETAILS OF TILDE-Q SUBLOSSES

As we discussed in Sec. 4.2, TILDE-Q consists of three sublosses:  $L_{a.shift}$ ,  $L_{phase}$ , and  $L_{amp}$ . Our design rationale for selecting these sublosses is described in Sec. 4.1. In this section, we describe the detailed connection between the sublosses and the design rationale (Eqs. 1, 2, and 3).

**Amplitude Shifting** Given two sets of points with the same length  $T$ ,  $X, X' \in \mathbb{R}^T$ , let us define their distance using the signed distance function  $g : \mathbb{R} \times \mathbb{R} \rightarrow \mathbb{R}$ . Then, for each point  $x, x'$  in set  $X, X'$ , we can define a point-wise distance set  $D$  with  $g$  as below:

$$D = [g(x_1, x'_1), \dots, g(x_T, x'_T)] = [d_1, \dots, d_T].$$

When we design  $L_{a.shift}$ , we have one main question: given an arbitrary  $X, X'$ , and  $g$ , how do we build a loss function that is invariant to *any* arbitrary gap  $k$ . In this work, we have reformulated this task from *ensuring equal gaps between all points* into *making uniform distribution of the gaps* (i.e.,  $\sum_i p_{d_i} \log p_{d_i}$  on the interval  $[1, T]$ ). Please note that we convert gaps into relative values since an absolute domain requires information for  $k$  for each data sample. Without loss of generality, we can say that this problem is equivalent to the problem of entropy maximization. Let us suppose that we convert the distance set  $D$  into the probability distribution by *Softmax* function,  $p_{d_i} = \text{Softmax}(d_i)$ . In this case, we can say that our optimization problem is maximize the entropy as below:

$$\text{maximize } L = \sum_{i=1}^T p_{d_i} \log p_{d_i},$$

which is well-known to have its global optima with  $\forall_{i \in [1, T]} p_{d_i} = \frac{1}{T}$ . Therefore, we formulate  $L_{a.shift}$  as Eq. 4, which satisfies Eq. 1. Please note that the noise robustness of  $L_{a.shift}$  relies on that of the signed distance function,  $g$ . Since  $L_{a.shift}$  requires computation of  $g$  and *Softmax*, it takes  $O(n)$  time for its computation.

**Phase Shifting** To discuss phase shifting and periodicity of a time-series, Fourier transform is an inevitable factor. However, in the real-world dataset, a few problems arise: 1) we are unaware of the frequencies and periodicity of the data itself, and 2) a direct use of Fourier coefficients may be biased by noise. During the design phase, we aim to solve these problems with  $L_{phase}$ . To extract the main flow of time-series data (i.e., the dominant periodicity or frequencies), we first define the dominant frequencies based on their statistical significance. Let  $X \in \mathbb{R}^T$  as an input signal. In the machine learning domain, researchers commonly suppose the input signal follows normal distribution  $X \sim \mathcal{N}(0, I)$ . Accordingly, its Fourier coefficients on frequency  $k$  is:

$$\mathcal{F}(X) = \sum_{n=1}^T x_n e^{-i2\pi kn/T} \sim \mathcal{N}(0, T).$$

After Fourier transform, we define  $k$  as a dominant frequency if  $k$  is greater than  $\sqrt{T}$ , which indicates statistical significance. However, in some cases, we have only a short sample to represent signals or a noisy signal that has no periodicity, which does not yield a statistically significant  $k$ . To prevent such cases, in  $L_{phase}$ , we guarantee that at least  $\sqrt{T}$  number of frequencies are selected as dominant frequencies.  $L_{phase}$  requires  $O(n \log n)$  time for its computation, which is inherited from complexity of Fast Fourier Transform.

**Uniform Amplification** Although effective,  $L_{phase}$  has two limitations: 1) it is not perfectly phase shifting invariant as it is optimized with Fourier coefficients, and 2) aforementioned two subloss terms still make no consideration for uniform amplification invariance. Inspired by Paparrizos & Gravano (2015), we utilize normalized correlation for the uniform amplification. Specifically, we normalize correlation  $R$  as follows:

$$R(\mathbf{X}, \mathbf{Y}) = \frac{\text{Corr}(\mathbf{X}, \mathbf{Y})}{\sqrt{\text{Corr}(\mathbf{X}, \mathbf{X}) \cdot \text{Corr}(\mathbf{Y}, \mathbf{Y})}},$$

where *Corr* is cross-correlation or auto-correlation, and  $R$  is normalized correlation. By using this term, we have uniform amplification invariant measure. We utilize  $L_{amp}$  as the subcomponent with small  $\gamma$ , since tolerance for the multiplication factor (i.e., uniform amplification) has greater influence than addition or phase shifting. As  $L_{phase}$ , by using fast Fourier transform,  $L_{amp}$  takes  $O(n \log n)$  time.

**TILDE-Q Design Rationale:**  $\alpha$  and  $\gamma$   $L_{a.shift}$  is built for amplitude shifting and designed to be effective with both periodic and nonperiodic signals. In contrast,  $L_{phase}$  handles uniform amplification and is tailored to perform optimally with periodic signals. Since  $L_{a.shift}$  and  $L_{phase}$  complement each other, we set  $\alpha$  to balance them. For example, a large  $\alpha$  value will work well for nonperiodic signals and will have less penalty for amplitude shifting. Additionally, we utilize  $L_{amp}$  as a subcomponent to calibrate the results (e.g.,  $\gamma = 0.01$ ). With this design, while preserving the shape-awareness of TILDE-Q, users can control specific invariances or conditions. For example, users can increase the value of  $\alpha$  to emphasize nonperiodic modeling when a dataset has no particular periodicity. This user-oriented objective setting is one of the strengths of TILDE-Q and increases its utility.

## B DETAILED EXPERIMENT SETUP

**Dataset** In our experiment, we utilize six datasets – Synthetic, ECG5000, and Traffic dataset for the simple model (i.e., Sequence-to-Sequence Gated Recurrent Unit) and ETTh2, ETTm2, and Electricity for the state-of-the-art model (i.e., Informer and N-Beats). For each dataset, we describe some metadata of them and the experimental setting, including the input length  $n$  and prediction window  $L$ . Our implementation could be found in Anonymized Github<sup>1</sup>.

**Synthetic:** As Le Guen & Thome (2019) describe, the Synthetic dataset is an artificial dataset for measuring model performance on sudden changes (step functions) with an input signal composed of two peaks. The amplitude and temporal position of the two peaks are randomly selected. Then the selected position and amplitude of the step are determined by a peak position and amplitude. We use 500 time-series for training, 500 for validation, and 500 for testing. For the Synthetic dataset, we set the input length as  $n = 20$  and the prediction window as  $L = 40$ . The generation code is provided in DILATE Github<sup>2</sup>.

**ECG5000:** This dataset is originally a 20-hour long ECG (Electrocardiogram), downloaded from Physionet<sup>3</sup> and archived in UCR Time Series Classification Archive (Dau et al., 2019). The data is split by each heartbeat and processed in equal lengths (140). In the training, we use 500 for training, 500 for validation, and 4000 for testing. We take the first  $n = 84$  steps as input and predict the last  $L = 56$  steps.

**Traffic:** Traffic dataset is a collection of 48 months (2015-2016) hourly road occupancy rate (between 0 to 1) data from the California Department of Transportation<sup>4</sup>. As Le Guen & Thome (2019) do, we utilize univariate series of the first sensor, a total of 17544 data points. We set our problem as forecasting  $L = 24$  future occupancy rates with  $n = 168$  historical data (past week). We use 60% of the data for training, 20% for validation, and the rest for evaluation.

**ETT:** The ETT (Electricity TraNSformer Temperature) dataset, published by Zhou et al. (2021), is 2-year data collected from two separate counties in China, including ETTh2 and ETTm2 datasets. Each data point has a target value of “oil temperature” and other 6 power load features. ETTh2 and ETTm2 datasets have 1-hour and 15-minute intervals, respectively. As Zhou et al. (2021) do, we split them into 12/4/4 months for the training/validation/testing. Detailed settings, such as the input and output length and hyperparameter setting, are based on the information at Informer Github<sup>5</sup>.

**ECL:** The ECL (Electricity Consuming Load) is a dataset recorded in kWh every 15 minutes from 2012 to 2014, for 321 clients. In our experiment, we split them into 15/3/4 months for the train/validation/test, as Zhou et al. (2021) do. Note that we use the same hyperparameter settings in the ETTh2 dataset.

**Deep Learning Model Architectures** We perform experiments with three different model architectures, including Sequence-to-Sequence GRU, Informer, and N-Beats. To induce models to predict future time-series in a timely manner, we set  $\alpha = 0.5$  and  $\gamma = 0.01$  for TILDE-Q. Other training

<sup>1</sup><https://anonymous.4open.science/r/TILDE-Q-9E54>

<sup>2</sup><https://github.com/vincent-leguen/DILATE>

<sup>3</sup><https://physionet.org/>

<sup>4</sup><http://pems.dot.ca.gov>

<sup>5</sup><https://github.com/zhouhaoyi/Informer2020>



metrics, including MSE and DILATE, are used as described in their original papers. All models are trained with Early Stopping and ADAM optimizer.

**Sequence-to-Sequence GRU** To evaluate TILDE-Q in simple model, we utilize one layer Sequence-to-Sequence GRU model. For the training of the GRU model, we set a learning rate of  $1e-3$ , hidden size of 128, trained by maximum 1000 epochs with Early Stopping and ADAM optimizer.

**Informer** When we train Informer with ETTh2, ETTm2, and ECL dataset, we utilize the official code and hyperparameter setting. In the case of ECL dataset, as the author answered in their official code<sup>5</sup>, we utilize the same hyperparameter and dataset splitting criteria as the ETTh2 dataset.

**N-Beats** For N-Beats, we utilize two generic blocks with a hidden size of 128. Additionally, we set the learning rate as  $1e-3$  for all three datasets.

**Autoformer** For Autoformer<sup>6</sup>, we use the official code and hyperparameter setting. For the ETTh2 dataset, we utilize hyperparameter settings described in the official code of FEDformer<sup>7</sup>.

**FEDformer** For FEDformer<sup>7</sup>, we use the official code and hyperparameter setting.

## C ADDITIONAL EVALUATIONS

### C.1 DETAILED EXPERIMENT RESULTS AND ANALYSIS

Table 3: Detailed experimental results on six real-world datasets (four cases) with N-Beats.

| Methods  |     | N-Beats + MSE |               |                |        | N-Beats + DILATE |         |                |        | N-Beats + TILDE-Q |                |                |               |
|----------|-----|---------------|---------------|----------------|--------|------------------|---------|----------------|--------|-------------------|----------------|----------------|---------------|
| Metric   |     | MSE           | DTW           | TDI            | LCSS   | MSE              | DTW     | TDI            | LCSS   | MSE               | DTW            | TDI            | LCSS          |
| ETTh2    | 96  | 0.1869        | 7.2379        | 2.3787         | 0.4688 | 0.3105           | 6.5849  | 3.6490         | 0.4879 | <b>0.1557</b>     | <b>5.1011</b>  | <b>1.3240</b>  | <b>0.5862</b> |
|          | 192 | 0.2385        | 11.5667       | 4.9153         | 0.4505 | 0.6186           | 9.7254  | 7.0831         | 0.4637 | <b>0.1738</b>     | <b>7.6334</b>  | <b>2.4122</b>  | <b>0.5819</b> |
|          | 336 | 0.2889        | 16.5255       | 11.5207        | 0.4544 | 1.1406           | 13.7328 | 14.6986        | 0.4584 | <b>0.2132</b>     | <b>11.3351</b> | <b>5.3556</b>  | <b>0.5373</b> |
|          | 720 | 0.3881        | 24.1570       | 18.8462        | 0.4381 | 1.6713           | 19.4392 | 23.7028        | 0.4575 | <b>0.3044</b>     | <b>17.6006</b> | <b>9.6636</b>  | <b>0.5287</b> |
| ETTM2    | 96  | <b>0.0790</b> | <b>3.9685</b> | <b>2.0436</b>  | 0.6721 | 0.1524           | 7.9302  | 5.5597         | 0.4379 | 0.0952            | 4.0110         | 2.1939         | <b>0.6902</b> |
|          | 192 | <b>0.1224</b> | 6.8695        | <b>3.2834</b>  | 0.5762 | 0.2055           | 10.0393 | 8.5602         | 0.5107 | 0.1286            | <b>6.3556</b>  | 4.9798         | <b>0.6160</b> |
|          | 336 | 0.1824        | 12.1438       | 8.5915         | 0.4587 | 0.2501           | 12.6342 | 16.1473        | 0.4819 | <b>0.1705</b>     | <b>8.9377</b>  | <b>8.3539</b>  | <b>0.6195</b> |
|          | 720 | 0.2370        | 22.8676       | 17.8458        | 0.4929 | 0.4170           | 17.7764 | 24.6877        | 0.5836 | <b>0.2336</b>     | <b>14.2715</b> | <b>19.0883</b> | <b>0.7070</b> |
| ECL      | 96  | 0.3666        | 3.5207        | 0.2989         | 0.6589 | 1.1156           | 5.1430  | 2.6613         | 0.5074 | <b>0.3183</b>     | <b>2.9707</b>  | <b>0.4844</b>  | <b>0.7229</b> |
|          | 192 | 0.4307        | 5.7578        | 0.4253         | 0.6212 | 1.1859           | 7.3406  | 2.8488         | 0.4973 | <b>0.3383</b>     | <b>4.1817</b>  | <b>0.4229</b>  | <b>0.7187</b> |
|          | 336 | 0.5199        | 8.5563        | 0.5384         | 0.5965 | 1.2460           | 9.5096  | 3.0517         | 0.5091 | <b>0.3831</b>     | <b>5.6643</b>  | <b>0.3024</b>  | <b>0.7112</b> |
|          | 720 | 0.6240        | 13.9436       | 0.6510         | 0.5717 | 1.3061           | 13.1928 | 3.7279         | 0.5337 | <b>0.4540</b>     | <b>8.9997</b>  | <b>0.3251</b>  | <b>0.6960</b> |
| Exchange | 96  | 0.4496        | 8.6395        | <b>4.3197</b>  | 0.4424 | 0.3945           | 8.9661  | 4.3286         | 0.4316 | <b>0.2748</b>     | <b>7.9744</b>  | 5.2964         | <b>0.4467</b> |
|          | 192 | <b>1.2161</b> | 12.1857       | 10.5166        | 0.4157 | 1.5684           | 13.0560 | 9.2434         | 0.4061 | 1.6629            | <b>11.5557</b> | <b>8.7896</b>  | <b>0.4348</b> |
|          | 336 | <b>1.4529</b> | 14.7085       | 19.0407        | 0.4130 | 3.6784           | 17.5189 | <b>17.2512</b> | 0.3871 | 1.8432            | <b>12.5648</b> | 20.8871        | <b>0.4603</b> |
|          | 720 | <b>1.8563</b> | 21.7347       | <b>50.6751</b> | 0.4073 | 3.9008           | 26.7020 | 74.0546        | 0.3400 | 2.8487            | <b>19.1588</b> | 53.8069        | <b>0.4619</b> |
| Traffic  | 96  | 0.2349        | 2.1046        | 0.0216         | 0.8303 | 2.3325           | 3.9657  | 1.2052         | 0.5250 | <b>0.2286</b>     | <b>2.0699</b>  | <b>0.0207</b>  | <b>0.8371</b> |
|          | 192 | <b>0.3014</b> | 3.4040        | 0.0142         | 0.7916 | 2.5627           | 5.4169  | 1.1355         | 0.5515 | 0.3352            | <b>3.2559</b>  | <b>0.0119</b>  | <b>0.8028</b> |
|          | 336 | <b>0.3455</b> | 4.6409        | 0.0088         | 0.7918 | 2.4599           | 8.2828  | 1.3377         | 0.5208 | 0.3990            | <b>4.2622</b>  | <b>0.0066</b>  | <b>0.8206</b> |
|          | 720 | <b>0.4298</b> | 7.0561        | 0.0045         | 0.7958 | 2.3522           | 12.6258 | 0.9967         | 0.5177 | 0.4480            | <b>6.7344</b>  | <b>0.0034</b>  | <b>0.8085</b> |
| Weather  | 96  | 0.0042        | 9.3228        | 5.9134         | 0.4072 | 0.0023           | 8.9289  | <b>5.0617</b>  | 0.4256 | <b>0.0010</b>     | <b>6.5198</b>  | 6.0450         | <b>0.5168</b> |
|          | 192 | 0.0056        | 10.9682       | 11.9549        | 0.4212 | 0.0030           | 12.8164 | 10.6858        | 0.4307 | <b>0.0017</b>     | <b>8.8391</b>  | <b>9.0867</b>  | <b>0.5076</b> |
|          | 336 | 0.0058        | 13.3578       | 14.6572        | 0.4243 | 0.0087           | 20.4895 | 23.7903        | 0.3579 | <b>0.0026</b>     | <b>11.8682</b> | <b>9.6758</b>  | <b>0.5074</b> |
|          | 720 | 0.0068        | 18.5861       | 22.1432        | 0.4315 | 0.1534           | 28.6021 | 47.4488        | 0.3982 | <b>0.0029</b>     | <b>17.1895</b> | <b>19.1942</b> | <b>0.5078</b> |

At first, we observe that the model optimized with TILDE-Q outperforms the same model optimized with other objective functions in both short- and long-term forecasting tasks. An interesting point in the results is the large increased errors of TDI and DTW with long-term forecasting. For example, TDI of Informer with DILATE shows dramatically increased error with the ECL dataset, as the forecasting window increases, while LCSS does not produce such a large increased error. We attribute this to the weakness of DTW-based loss functions, which have a weakness due to high sensitiveness to noise. In contrast, TILDE-Q does not show such a large performance drop and even achieves

<sup>6</sup><https://github.com/thuml/Autoformer>

<sup>7</sup><https://github.com/MAZiqing/FEDformer>

Table 4: Detailed experimental results on six real-world datasets (four cases) with Informer.

| Methods  |     | Informer + MSE |               |               |               | Informer + DILATE |                |                |               | Informer + TILDE-Q |                |                |               |
|----------|-----|----------------|---------------|---------------|---------------|-------------------|----------------|----------------|---------------|--------------------|----------------|----------------|---------------|
| Metric   |     | MSE            | DTW           | TDI           | LCSS          | MSE               | DTW            | TDI            | LCSS          | MSE                | DTW            | TDI            | LCSS          |
| ETTh2    | 96  | 0.2466         | 6.9254        | 3.6676        | 0.4633        | 0.3284            | 6.3109         | 3.5838         | 0.5037        | <b>0.1768</b>      | <b>5.8437</b>  | <b>1.6734</b>  | <b>0.5379</b> |
|          | 192 | 0.2818         | 10.2654       | 11.1580       | 0.4254        | 0.4086            | <b>8.8262</b>  | <b>7.1780</b>  | <b>0.4893</b> | <b>0.2432</b>      | 10.2134        | 9.9865         | 0.4317        |
|          | 336 | 0.3089         | 12.1822       | 18.7014       | 0.4434        | 0.4164            | <b>10.3779</b> | <b>13.2580</b> | <b>0.5062</b> | <b>0.2958</b>      | 13.5586        | 20.2850        | 0.4165        |
|          | 720 | <b>0.2877</b>  | 17.6369       | 38.4617       | 0.4425        | 0.4229            | <b>14.1196</b> | <b>23.9403</b> | <b>0.4815</b> | 0.3157             | 18.4617        | 43.3238        | 0.4262        |
| ETTm2    | 96  | 0.0889         | 3.4007        | 1.5719        | 0.7386        | 0.1263            | 6.0144         | 2.7757         | 0.5129        | <b>0.0871</b>      | <b>3.1354</b>  | <b>1.3474</b>  | <b>0.7817</b> |
|          | 192 | <b>0.1157</b>  | 5.7964        | <b>2.8128</b> | 0.6705        | 0.2340            | 9.7004         | 7.8354         | 0.5266        | 0.1317             | <b>5.7093</b>  | 2.9129         | <b>0.6983</b> |
|          | 336 | 0.1860         | <b>8.9971</b> | <b>6.7970</b> | 0.6365        | 0.2805            | 11.7889        | 13.3861        | 0.5025        | <b>0.1767</b>      | 9.0866         | 7.4023         | <b>0.6555</b> |
|          | 720 | 0.2165         | 14.7685       | 24.6694       | 0.5768        | 0.3745            | 16.7734        | 29.2783        | 0.4747        | <b>0.2063</b>      | <b>15.3057</b> | <b>24.1959</b> | <b>0.5860</b> |
| ECL      | 96  | <b>0.2709</b>  | <b>2.8067</b> | <b>0.1720</b> | 0.7032        | 0.9856            | 3.6394         | 1.4794         | 0.6324        | 0.2800             | 2.9466         | 0.2473         | <b>0.7275</b> |
|          | 192 | <b>0.2793</b>  | <b>4.1193</b> | <b>0.1508</b> | 0.7060        | 1.1209            | 5.2289         | 2.1749         | 0.6053        | 0.3077             | 4.2693         | 0.2978         | <b>0.7336</b> |
|          | 336 | 0.3203         | 5.9533        | 0.1642        | 0.7222        | 1.2331            | 7.8470         | 3.0415         | 0.5694        | <b>0.3271</b>      | <b>5.8090</b>  | <b>0.1984</b>  | <b>0.7143</b> |
|          | 720 | 0.6414         | 15.8561       | 4.4284        | 0.4564        | 1.3706            | 12.5981        | 5.6720         | 0.5506        | <b>0.4676</b>      | <b>11.4027</b> | <b>0.7107</b>  | <b>0.6298</b> |
| Exchange | 96  | 0.3534         | 8.0965        | <b>4.8843</b> | <b>0.4689</b> | <b>0.3260</b>     | <b>7.7370</b>  | 5.6336         | 0.4678        | 0.5264             | 7.9866         | 6.5120         | 0.4553        |
|          | 192 | <b>0.9682</b>  | 11.0843       | 11.3110       | 0.4647        | 0.9737            | 10.8894        | 15.6770        | 0.4584        | 1.2845             | <b>10.4358</b> | <b>10.7009</b> | <b>0.4959</b> |
|          | 336 | <b>1.3710</b>  | 12.8076       | 18.5937       | 0.4676        | 1.6735            | 12.7034        | 29.2013        | 0.4428        | 1.6912             | <b>12.2349</b> | <b>18.2197</b> | <b>0.4932</b> |
|          | 720 | <b>1.7586</b>  | 22.6852       | 59.4243       | 0.4681        | 1.8292            | <b>16.0093</b> | <b>56.8687</b> | <b>0.5293</b> | 1.9130             | 24.0510        | 62.8152        | 0.5104        |
| Traffic  | 96  | 0.2606         | 2.0994        | 0.0208        | 0.8329        | 2.9612            | 2.3355         | 0.9646         | 0.7312        | <b>0.2284</b>      | <b>2.0027</b>  | <b>0.0194</b>  | <b>0.8490</b> |
|          | 192 | 0.2920         | 3.2573        | 0.0126        | 0.8158        | 2.9978            | 3.5451         | 0.8429         | 0.7394        | <b>0.2753</b>      | <b>3.1721</b>  | <b>0.0125</b>  | <b>0.8248</b> |
|          | 336 | 0.3109         | 4.6581        | 0.0078        | 0.8115        | 2.9696            | 4.9879         | 1.2672         | 0.7117        | <b>0.2993</b>      | <b>4.4715</b>  | <b>0.0077</b>  | <b>0.8170</b> |
|          | 720 | <b>0.3472</b>  | <b>6.7989</b> | <b>0.0040</b> | <b>0.8146</b> | 2.6845            | 10.7450        | 3.4514         | 0.5874        | 0.3859             | 7.5424         | 0.0051         | 0.7752        |
| Weather  | 96  | 0.0043         | 8.2890        | 5.4604        | 0.4556        | 0.0069            | 6.5571         | 4.7505         | 0.5159        | <b>0.0021</b>      | <b>5.5412</b>  | <b>4.5012</b>  | <b>0.5602</b> |
|          | 192 | 0.0031         | 10.7993       | 9.2928        | 0.4523        | 0.0041            | 10.5645        | 9.4713         | 0.4704        | <b>0.0028</b>      | <b>8.2535</b>  | <b>5.8289</b>  | <b>0.5516</b> |
|          | 336 | 0.0051         | 13.8721       | 22.2699       | 0.4451        | 0.0055            | 12.0586        | 16.4933        | 0.4884        | <b>0.0039</b>      | <b>10.8802</b> | <b>10.5220</b> | <b>0.5668</b> |
|          | 720 | 0.0061         | 21.7720       | 41.5877       | 0.4476        | 0.0737            | 16.8378        | 29.8112        | 0.5142        | <b>0.0047</b>      | <b>13.9934</b> | <b>20.9991</b> | <b>0.5689</b> |

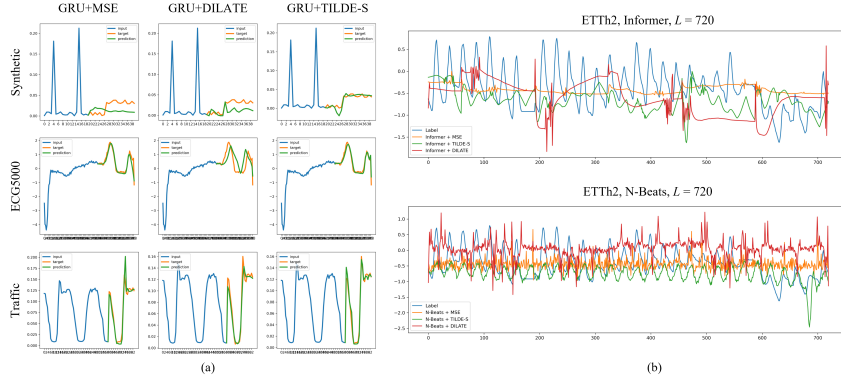

Figure 3: Qualitative results with simple sequence-to-sequence GRU model (a) and state-of-the-art model (b).

better performance in the long-term forecasting (e.g., Table 4, ETTh2). Additionally, we can find that Informer with TILDE-Q on ECL data and N-Beats with TILDE-Q on all three datasets show significant improvements. It indicates that TILDE-Q success to model *shape*, but other metrics could not. We provide additional qualitative analysis in Appendix C.2. **For the experimental results with standard deviation and NLinear (Zeng et al., 2023), please visit our Anonymous GitHub<sup>1</sup>.**

Next, we present a qualitative analysis of the results. Fig. 3 shows how the model with different training metrics forecasts with different datasets. From the figure, we have noticed that TILDE-Q allows the model to generate more robust, shape-aware forecasting, regardless of amplitude shifting, phase shifting, and uniform amplification. For example, in the case of N-Beats (Fig. 3 (b) bottom), TILDE-Q generate forecasting results, which are more robust, shape-aware prediction compared to other metrics. We also see the strength in the Informer case (Fig. 3 (b), top). Even when the model has not enough ability to capture shape, TILDE-Q tries to retrieve the shape. We provide additional qualitative results with the visualization below. When the model has enough ability to

capture shape (i.e., except ETTh2, Informer of  $T' \in [192, 336, 720]$ ), TILDE-Q has shown its noise-robust, smooth forecasting with correctly modeled temporal dynamics. In the most of N-Beats results and some of the Informer results, TILDE-Q reveals that these models have enough ability to capture the temporal dynamics with a proper loss function. In summary, TILDE-Q proves that it is model-agnostic, noise-robust, and able to capture the shape.

Table 5: Detailed experimental results on six real-world datasets (four cases) with Autoformer.

| Methods  |     | Autoformer + MSE |                |                |               | Autoformer + DILATE |               |               |               | Autoformer + TILDE-Q |                |                 |               |
|----------|-----|------------------|----------------|----------------|---------------|---------------------|---------------|---------------|---------------|----------------------|----------------|-----------------|---------------|
| Metric   |     | MSE              | DTW            | TDI            | LCSS          | MSE                 | DTW           | TDI           | LCSS          | MSE                  | DTW            | TDI             | LCSS          |
| ETTh2    | 96  | 0.1538           | 5.2227         | 2.1865         | 0.6187        | 0.2211              | 6.0453        | 2.5345        | 0.5315        | <b>0.1494</b>        | <b>5.1060</b>  | <b>1.9752</b>   | <b>0.6317</b> |
|          | 192 | <b>0.1974</b>    | <b>7.8730</b>  | <b>3.3382</b>  | <b>0.6019</b> | 0.2825              | 8.6696        | 5.6671        | 0.5335        | 0.2079               | 7.8917         | 3.7532          | 0.5984        |
|          | 336 | 0.2393           | 10.8002        | 7.3141         | 0.5954        | 0.3759              | 11.0335       | 13.1347       | 0.5257        | <b>0.2360</b>        | <b>10.7212</b> | <b>7.0085</b>   | <b>0.5971</b> |
|          | 720 | 0.2859           | 16.3502        | 15.9233        | 0.5772        | 0.4296              | 15.9819       | 22.2173       | 0.4924        | <b>0.2378</b>        | <b>16.0002</b> | <b>13.7906</b>  | <b>0.5795</b> |
| ETTm2    | 96  | 0.0990           | 4.3498         | 2.5052         | 0.6756        | 0.1135              | 5.3097        | <b>2.2211</b> | 0.5936        | <b>0.0940</b>        | <b>3.9078</b>  | 2.2587          | <b>0.7075</b> |
|          | 192 | 0.1340           | 6.3207         | 3.3676         | 0.6512        | 0.1854              | 8.5209        | 3.7894        | 0.5506        | <b>0.1259</b>        | <b>6.0979</b>  | <b>2.9278</b>   | <b>0.6810</b> |
|          | 336 | 0.1587           | <b>9.4374</b>  | 6.9205         | 0.6036        | 0.2001              | 12.0265       | 8.8305        | 0.5370        | <b>0.1548</b>        | 9.5223         | <b>7.2875</b>   | <b>0.6169</b> |
|          | 720 | 0.1999           | 14.8332        | 11.9655        | 0.6064        | 0.2665              | 17.8025       | 17.4114       | 0.5001        | <b>0.1885</b>        | <b>14.5844</b> | <b>9.9918</b>   | <b>0.6277</b> |
| ECL      | 96  | 0.4209           | 3.5957         | 0.2461         | 0.6487        | 0.6813              | 3.6490        | 0.4780        | 0.6253        | <b>0.3515</b>        | <b>3.2173</b>  | <b>0.2298</b>   | <b>0.6912</b> |
|          | 192 | 0.4206           | 4.9924         | 0.3416         | 0.6574        | 0.7319              | 5.5324        | <b>0.2775</b> | 0.6118        | <b>0.4032</b>        | <b>4.8581</b>  | 0.3301          | <b>0.6680</b> |
|          | 336 | <b>0.4621</b>    | 6.6888         | 0.2795         | <b>0.6535</b> | 0.7895              | 7.5665        | <b>0.2503</b> | 0.6091        | 0.4637               | <b>6.7335</b>  | 0.3923          | 0.6429        |
|          | 720 | <b>0.5005</b>    | 10.8571        | 0.2383         | 0.6183        | 0.8630              | 12.1416       | <b>0.1877</b> | 0.6074        | 0.5049               | <b>9.8492</b>  | 0.2525          | <b>0.6420</b> |
| Exchange | 96  | 0.2472           | 8.2957         | 5.8340         | 0.4577        | 0.1921              | 8.4651        | 5.6328        | <b>0.4646</b> | <b>0.1730</b>        | <b>8.2046</b>  | <b>5.1165</b>   | 0.4577        |
|          | 192 | 0.3255           | 11.4212        | 17.0909        | 0.4319        | 0.4732              | 12.8599       | 19.0164       | 0.4124        | <b>0.2955</b>        | <b>11.3655</b> | <b>15.4372</b>  | <b>0.4433</b> |
|          | 336 | 0.5483           | <b>15.1853</b> | <b>44.4975</b> | 0.3277        | 0.8035              | 18.0948       | 57.5819       | 0.3114        | <b>0.5331</b>        | 16.7350        | 45.8166         | <b>0.3321</b> |
|          | 720 | 1.3620           | 24.6397        | 145.3080       | <b>0.2357</b> | 1.4936              | 27.7069       | 151.6671      | 0.2302        | <b>1.1993</b>        | <b>19.5296</b> | <b>121.8509</b> | 0.2233        |
| Traffic  | 96  | 0.2562           | 1.9689         | 0.0178         | 0.8761        | 0.4835              | 1.9044        | 0.0392        | 0.8521        | <b>0.2275</b>        | <b>1.8778</b>  | <b>0.0168</b>   | <b>0.8879</b> |
|          | 192 | 0.2604           | 2.8922         | <b>0.0091</b>  | 0.8780        | 0.5653              | 3.0466        | 0.0343        | 0.8187        | <b>0.2497</b>        | <b>2.8793</b>  | 0.0116          | <b>0.8817</b> |
|          | 336 | 0.2474           | 4.0026         | <b>0.0051</b>  | <b>0.8797</b> | 0.8155              | 4.2637        | 0.0327        | 0.8047        | <b>0.2422</b>        | <b>3.9469</b>  | 0.0059          | 0.8760        |
|          | 720 | <b>0.2720</b>    | 6.4371         | <b>0.0030</b>  | <b>0.8710</b> | 1.0729              | <b>6.0776</b> | 0.0217        | 0.8176        | 0.2836               | 6.1751         | 0.0034          | 0.8674        |
| Weather  | 96  | 0.0168           | 7.4658         | 6.0336         | 0.4818        | 0.0019              | <b>5.9775</b> | 4.9688        | 0.5306        | <b>0.0015</b>        | 5.9829         | <b>4.8957</b>   | <b>0.5461</b> |
|          | 192 | 0.0069           | 10.6173        | 7.4506         | 0.4941        | 0.0026              | 8.3686        | <b>5.4565</b> | <b>0.5423</b> | <b>0.0017</b>        | <b>7.7799</b>  | 6.1032          | 0.5355        |
|          | 336 | 0.0052           | 12.5224        | 13.2607        | 0.4898        | 0.0030              | 12.4524       | 12.1816       | 0.4854        | <b>0.0020</b>        | <b>10.3144</b> | <b>9.0025</b>   | <b>0.5252</b> |
|          | 720 | 0.0078           | 18.5079        | 25.8063        | 0.4744        | 0.0115              | 20.1354       | 36.7754       | 0.4721        | <b>0.0023</b>        | <b>15.2563</b> | <b>18.3134</b>  | <b>0.5102</b> |

Table 6: Detailed experimental results on six real-world datasets (four cases) with FEDformer.

| Methods  |     | FEDformer + MSE |               |                |               | FEDformer + DILATE |                |               |               | FEDformer + TILDE-Q |                |                |               |
|----------|-----|-----------------|---------------|----------------|---------------|--------------------|----------------|---------------|---------------|---------------------|----------------|----------------|---------------|
| Metric   |     | MSE             | DTW           | TDI            | LCSS          | MSE                | DTW            | TDI           | LCSS          | MSE                 | DTW            | TDI            | LCSS          |
| ETTh2    | 96  | <b>0.1299</b>   | <b>4.7265</b> | <b>1.2607</b>  | <b>0.6690</b> | 0.1906             | 6.2294         | 1.8228        | 0.5261        | 0.1381              | 4.7578         | 1.3560         | 0.6621        |
|          | 192 | <b>0.1819</b>   | 7.6178        | <b>2.6979</b>  | <b>0.6229</b> | 0.2688             | 8.8422         | 4.8043        | 0.5261        | 0.1988              | <b>7.6174</b>  | 2.7712         | 0.6124        |
|          | 336 | <b>0.2305</b>   | 10.5860       | 6.7027         | <b>0.6050</b> | 0.3506             | 11.4834        | 12.8408       | 0.5091        | 0.2382              | <b>10.4108</b> | <b>6.6218</b>  | 0.6039        |
|          | 720 | <b>0.2776</b>   | 15.7013       | <b>14.7466</b> | <b>0.5911</b> | 0.4327             | <b>14.0692</b> | 20.6266       | 0.5091        | 0.2871              | 15.3120        | 16.4059        | 0.5808        |
| ETTm2    | 96  | 0.0682          | 3.0962        | 1.3862         | 0.7868        | 0.1147             | 4.6648         | 2.2981        | 0.6325        | <b>0.0669</b>       | <b>3.0328</b>  | <b>1.3556</b>  | <b>0.7918</b> |
|          | 192 | 0.0976          | 5.2417        | <b>2.0295</b>  | 0.7340        | 0.1848             | 8.0678         | 4.4893        | 0.5391        | <b>0.0971</b>       | <b>5.1508</b>  | 2.1782         | <b>0.7384</b> |
|          | 336 | 0.1326          | 8.3151        | 5.4619         | 0.6667        | 0.2493             | 13.6349        | 11.7563       | 0.5049        | <b>0.1279</b>       | <b>8.3010</b>  | <b>4.5488</b>  | <b>0.6828</b> |
|          | 720 | 0.1957          | 14.2579       | 11.8328        | 0.6262        | 0.2913             | 17.4636        | 41.9434       | 0.4806        | <b>0.1822</b>       | <b>14.1131</b> | <b>10.4778</b> | <b>0.6361</b> |
| ECL      | 96  | <b>0.2531</b>   | <b>2.6402</b> | <b>0.1436</b>  | <b>0.7322</b> | 0.4794             | 2.8685         | 0.2482        | 0.6943        | 0.2638              | 2.6594         | 0.1614         | 0.7265        |
|          | 192 | 0.2945          | 3.8647        | 0.1831         | 0.7306        | 0.5485             | 4.3313         | 0.1732        | 0.6813        | <b>0.2821</b>       | <b>3.7830</b>  | <b>0.1277</b>  | <b>0.7340</b> |
|          | 336 | <b>0.3313</b>   | 5.2789        | <b>0.1078</b>  | 0.7207        | 0.6967             | 5.7911         | 0.1985        | 0.6892        | 0.3385              | <b>5.1763</b>  | 0.1229         | <b>0.7290</b> |
|          | 720 | 0.3956          | 8.5881        | <b>0.0632</b>  | 0.6961        | 0.7741             | 10.1163        | 0.8837        | 0.6403        | <b>0.3939</b>       | <b>8.5665</b>  | 0.0784         | <b>0.7013</b> |
| Exchange | 96  | 0.1437          | 8.5595        | <b>4.4258</b>  | 0.4347        | 0.3884             | 8.9178         | 7.0385        | 0.4439        | <b>0.1215</b>       | <b>8.0591</b>  | 6.1979         | <b>0.4704</b> |
|          | 192 | <b>0.2694</b>   | 12.5168       | 12.3117        | 0.4202        | 0.5912             | 13.1929        | 15.4207       | 0.4187        | 0.2956              | <b>11.5607</b> | <b>12.1302</b> | <b>0.4474</b> |
|          | 336 | <b>0.4916</b>   | 16.4673       | 27.0756        | 0.4140        | 0.7520             | 18.1381        | 33.7878       | 0.3969        | 0.5896              | <b>15.9267</b> | <b>24.8808</b> | <b>0.4342</b> |
|          | 720 | 1.2115          | 25.6243       | 108.0500       | 0.3838        | 1.5110             | 26.7031        | 91.6313       | 0.3760        | <b>1.1700</b>       | <b>24.6190</b> | <b>71.8783</b> | <b>0.3935</b> |
| Traffic  | 96  | 0.2074          | 1.9132        | 0.0165         | 0.8824        | 0.3533             | 1.8617         | 0.0291        | 0.8609        | <b>0.1867</b>       | <b>1.8386</b>  | <b>0.0152</b>  | <b>0.8983</b> |
|          | 192 | 0.2051          | 2.7761        | 0.0085         | 0.8951        | 1.4682             | 2.7545         | 0.1312        | 0.8591        | <b>0.1961</b>       | <b>2.7380</b>  | <b>0.0083</b>  | <b>0.8975</b> |
|          | 336 | 0.2140          | <b>3.7583</b> | <b>0.0047</b>  | <b>0.9023</b> | 2.9741             | 3.7440         | 0.1779        | 0.8519        | <b>0.2059</b>       | 3.7834         | 0.0050         | 0.8947        |
|          | 720 | <b>0.2291</b>   | <b>5.9735</b> | 0.0026         | <b>0.8919</b> | 3.0829             | 5.8173         | 0.0949        | 0.8580        | 0.2312              | 6.1080         | <b>0.0022</b>  | 0.8735        |
| Weather  | 96  | 0.0070          | 6.1550        | 4.7039         | 0.5264        | 0.0017             | 5.9507         | 4.5891        | 0.5535        | <b>0.0014</b>       | <b>5.5205</b>  | <b>4.1085</b>  | <b>0.5792</b> |
|          | 192 | 0.0063          | 7.6906        | 6.2940         | 0.5417        | 0.0020             | 8.6593         | <b>4.6333</b> | <b>0.6000</b> | <b>0.0017</b>       | <b>6.9706</b>  | 5.0003         | 0.5863        |
|          | 336 | 0.0046          | 10.3501       | 9.4691         | 0.5261        | 0.0053             | 14.8249        | 9.6239        | 0.4801        | <b>0.0018</b>       | <b>9.3016</b>  | <b>7.4610</b>  | <b>0.5784</b> |
|          | 720 | 0.0060          | 15.2429       | 24.5379        | 0.4911        | 0.0029             | 16.3929        | 20.0782       | 0.4892        | <b>0.0024</b>       | <b>13.7936</b> | <b>15.7668</b> | <b>0.5737</b> |

Table 7: Detailed experimental results on six real-world datasets (four cases) with NSFormer.

| Methods  |     | NSFormer + MSE                        |                                        |                                        |                                       | NSFormer + TILDE-Q                    |                                        |                                        |                                       |
|----------|-----|---------------------------------------|----------------------------------------|----------------------------------------|---------------------------------------|---------------------------------------|----------------------------------------|----------------------------------------|---------------------------------------|
| Metric   |     | MSE                                   | DTW                                    | TDI                                    | LCSS                                  | MSE                                   | DTW                                    | TDI                                    | LCSS                                  |
| ETTh2    | 96  | 0.1868 $\pm$ 0.0173                   | 5.7546 $\pm$ 0.5472                    | 2.0024 $\pm$ 0.1875                    | 0.5522 $\pm$ 0.0504                   | <b>0.1629 <math>\pm</math> 0.0083</b> | <b>5.1673 <math>\pm</math> 0.0355</b>  | <b>1.4536 <math>\pm</math> 0.5094</b>  | <b>0.6083 <math>\pm</math> 0.0080</b> |
|          | 192 | 0.2311 $\pm$ 0.0053                   | 8.6408 $\pm$ 0.6911                    | <b>3.8789 <math>\pm</math> 0.0671</b>  | 0.5301 $\pm$ 0.0440                   | <b>0.2016 <math>\pm</math> 0.0056</b> | <b>8.0815 <math>\pm</math> 0.0596</b>  | 4.0217 $\pm$ 0.1380                    | <b>0.5963 <math>\pm</math> 0.0004</b> |
|          | 336 | <b>0.2624 <math>\pm</math> 0.0167</b> | 11.1345 $\pm$ 0.3661                   | <b>10.0050 <math>\pm</math> 0.7225</b> | 0.5530 $\pm$ 0.0131                   | 0.2760 $\pm$ 0.0136                   | <b>11.0140 <math>\pm</math> 0.0735</b> | 10.8131 $\pm$ 0.7981                   | <b>0.5598 <math>\pm</math> 0.0050</b> |
|          | 720 | <b>0.2391 <math>\pm</math> 0.0025</b> | 15.9557 $\pm$ 0.0797                   | <b>18.2158 <math>\pm</math> 1.4161</b> | 0.5409 $\pm$ 0.0154                   | 0.2663 $\pm$ 0.0102                   | <b>15.0010 <math>\pm</math> 0.1701</b> | 19.5509 $\pm$ 1.3960                   | <b>0.5575 <math>\pm</math> 0.0084</b> |
| ETTm2    | 96  | <b>0.0682 <math>\pm</math> 0.0011</b> | <b>3.2222 <math>\pm</math> 0.0710</b>  | <b>1.5062 <math>\pm</math> 0.0636</b>  | <b>0.7681 <math>\pm</math> 0.0029</b> | 0.0704 $\pm$ 0.0017                   | 3.2704 $\pm$ 0.0382                    | 1.5464 $\pm$ 0.0593                    | 0.7678 $\pm$ 0.0018                   |
|          | 192 | <b>0.1107 <math>\pm</math> 0.0061</b> | 5.6567 $\pm$ 0.1432                    | 3.1250 $\pm$ 0.3309                    | 0.6897 $\pm$ 0.0052                   | 0.1142 $\pm$ 0.0097                   | <b>5.4756 <math>\pm</math> 0.0160</b>  | <b>3.0431 <math>\pm</math> 0.1125</b>  | <b>0.7091 <math>\pm</math> 0.0051</b> |
|          | 336 | 0.1655 $\pm$ 0.0156                   | 9.0536 $\pm$ 0.2199                    | <b>7.3496 <math>\pm</math> 0.2607</b>  | 0.6285 $\pm$ 0.0146                   | <b>0.1590 <math>\pm</math> 0.0033</b> | <b>8.9267 <math>\pm</math> 0.1396</b>  | 8.5419 $\pm$ 0.8318                    | <b>0.6450 <math>\pm</math> 0.0049</b> |
|          | 720 | 0.2349 $\pm$ 0.0202                   | 14.8967 $\pm$ 0.3186                   | <b>19.1985 <math>\pm</math> 1.7474</b> | 0.5587 $\pm$ 0.0156                   | <b>0.2209 <math>\pm</math> 0.0126</b> | <b>14.8251 <math>\pm</math> 0.0936</b> | 20.4820 $\pm$ 0.6624                   | <b>0.5892 <math>\pm</math> 0.0030</b> |
| ECL      | 96  | <b>0.3117 <math>\pm</math> 0.0102</b> | 3.1460 $\pm$ 0.0466                    | <b>0.3059 <math>\pm</math> 0.0078</b>  | 0.6839 $\pm$ 0.0051                   | 0.3136 $\pm$ 0.0069                   | <b>3.0445 <math>\pm</math> 0.0511</b>  | 0.3170 $\pm$ 0.0273                    | <b>0.6876 <math>\pm</math> 0.0012</b> |
|          | 192 | 0.3789 $\pm$ 0.0160                   | 4.6092 $\pm$ 0.0077                    | <b>0.3790 <math>\pm</math> 0.0398</b>  | 0.6736 $\pm$ 0.0252                   | <b>0.3453 <math>\pm</math> 0.0158</b> | <b>4.4510 <math>\pm</math> 0.1726</b>  | 0.3892 $\pm$ 0.0469                    | <b>0.6853 <math>\pm</math> 0.0049</b> |
|          | 336 | 0.3856 $\pm$ 0.0072                   | 6.2827 $\pm$ 0.0620                    | <b>0.2954 <math>\pm</math> 0.0678</b>  | 0.6724 $\pm$ 0.0098                   | <b>0.3633 <math>\pm</math> 0.0062</b> | <b>6.0038 <math>\pm</math> 0.0717</b>  | 0.3573 $\pm$ 0.0336                    | <b>0.6953 <math>\pm</math> 0.0075</b> |
|          | 720 | 0.4102 $\pm$ 0.0426                   | 10.0263 $\pm$ 0.0869                   | 1.7172 $\pm$ 1.0628                    | 0.6680 $\pm$ 0.0107                   | <b>0.3999 <math>\pm</math> 0.0071</b> | <b>9.6903 <math>\pm</math> 0.0497</b>  | <b>0.6640 <math>\pm</math> 0.2962</b>  | <b>0.6716 <math>\pm</math> 0.0059</b> |
| Exchange | 96  | 0.1514 $\pm$ 0.0505                   | 8.4840 $\pm$ 0.1408                    | <b>6.2843 <math>\pm</math> 0.3800</b>  | 0.4600 $\pm$ 0.0100                   | <b>0.1078 <math>\pm</math> 0.0084</b> | <b>8.0182 <math>\pm</math> 0.2299</b>  | 7.4383 $\pm$ 0.6279                    | <b>0.4667 <math>\pm</math> 0.0037</b> |
|          | 192 | 0.2514 $\pm$ 0.0280                   | <b>10.7493 <math>\pm</math> 0.8153</b> | <b>14.7287 <math>\pm</math> 2.0162</b> | 0.4723 $\pm$ 0.0105                   | <b>0.2219 <math>\pm</math> 0.0247</b> | 11.0704 $\pm$ 0.5110                   | 15.5720 $\pm$ 3.1424                   | <b>0.4898 <math>\pm</math> 0.0191</b> |
|          | 336 | 0.5246 $\pm$ 0.0908                   | 12.3626 $\pm$ 1.0148                   | 25.7294 $\pm$ 1.0591                   | 0.4873 $\pm$ 0.0138                   | <b>0.4219 <math>\pm</math> 0.0740</b> | <b>11.9023 <math>\pm</math> 0.5967</b> | <b>23.2522 <math>\pm</math> 1.5396</b> | <b>0.4928 <math>\pm</math> 0.0049</b> |
|          | 720 | 0.8866 $\pm$ 0.1059                   | 18.8469 $\pm$ 3.5656                   | 54.3978 $\pm$ 10.9369                  | 0.5006 $\pm$ 0.0075                   | <b>0.7557 <math>\pm</math> 0.0535</b> | <b>13.7467 <math>\pm</math> 1.3978</b> | <b>42.9306 <math>\pm</math> 9.0610</b> | <b>0.5199 <math>\pm</math> 0.0201</b> |
| Traffic  | 96  | <b>0.1916 <math>\pm</math> 0.0131</b> | 1.7903 $\pm$ 0.0393                    | 0.0148 $\pm$ 0.0006                    | 0.9012 $\pm$ 0.0076                   | 0.2035 $\pm$ 0.0101                   | <b>1.7658 <math>\pm</math> 0.0213</b>  | <b>0.0134 <math>\pm</math> 0.0007</b>  | <b>0.9088 <math>\pm</math> 0.0069</b> |
|          | 192 | <b>0.1829 <math>\pm</math> 0.0086</b> | 2.7411 $\pm$ 0.0295                    | 0.0083 $\pm$ 0.0001                    | 0.9000 $\pm$ 0.0040                   | 0.1838 $\pm$ 0.0113                   | <b>2.7329 <math>\pm</math> 0.0139</b>  | <b>0.0079 <math>\pm</math> 0.0002</b>  | <b>0.9038 <math>\pm</math> 0.0133</b> |
|          | 336 | 0.2017 $\pm$ 0.0046                   | 3.7920 $\pm$ 0.0107                    | 0.0049 $\pm$ 0.0002                    | 0.8959 $\pm$ 0.0021                   | <b>0.1919 <math>\pm</math> 0.0054</b> | <b>3.7476 <math>\pm</math> 0.0310</b>  | <b>0.0046 <math>\pm</math> 0.0001</b>  | <b>0.8993 <math>\pm</math> 0.0019</b> |
|          | 720 | 0.2294 $\pm$ 0.0077                   | 6.0884 $\pm$ 0.1178                    | 0.0027 $\pm$ 0.0001                    | 0.8833 $\pm$ 0.0077                   | <b>0.2287 <math>\pm</math> 0.0071</b> | <b>5.8202 <math>\pm</math> 0.0803</b>  | <b>0.0024 <math>\pm</math> 0.0001</b>  | <b>0.8972 <math>\pm</math> 0.0030</b> |
| Weather  | 96  | 0.0017 $\pm$ 0.0005                   | 8.2914 $\pm$ 1.1221                    | 7.8379 $\pm$ 1.5827                    | 0.4230 $\pm$ 0.0378                   | <b>0.0012 <math>\pm</math> 0.0001</b> | <b>5.7786 <math>\pm</math> 0.0468</b>  | <b>5.4118 <math>\pm</math> 0.1960</b>  | <b>0.5451 <math>\pm</math> 0.0037</b> |
|          | 192 | 0.0020 $\pm$ 0.0002                   | 9.9842 $\pm$ 0.4992                    | 10.8039 $\pm$ 1.9632                   | 0.4536 $\pm$ 0.0025                   | <b>0.0014 <math>\pm</math> 0.0000</b> | <b>7.3667 <math>\pm</math> 0.0967</b>  | <b>6.2922 <math>\pm</math> 0.2090</b>  | <b>0.5532 <math>\pm</math> 0.0060</b> |
|          | 336 | 0.0018 $\pm$ 0.0002                   | 13.6885 $\pm$ 0.7604                   | 14.9242 $\pm$ 1.3217                   | 0.4308 $\pm$ 0.0161                   | <b>0.0015 <math>\pm</math> 0.0001</b> | <b>9.9883 <math>\pm</math> 0.0800</b>  | <b>9.0103 <math>\pm</math> 0.5340</b>  | <b>0.5529 <math>\pm</math> 0.0020</b> |
|          | 720 | 0.0022 $\pm$ 0.0002                   | 16.7372 $\pm$ 0.5878                   | 33.7388 $\pm$ 4.4616                   | 0.4751 $\pm$ 0.0025                   | <b>0.0020 <math>\pm</math> 0.0000</b> | <b>14.7109 <math>\pm</math> 0.4148</b> | <b>17.1988 <math>\pm</math> 0.9428</b> | <b>0.5405 <math>\pm</math> 0.0051</b> |

## C.2 QUALITATIVE EVALUATION

As we have described, *shape* is hard to be captured by using existing metrics, such as  $L_p$  metrics. We therefore showcase each model, training metric, and dataset. For the evaluation of TILDE-Q, we visualize the forecasting results using various models. Specifically, we report four cases: 1) when TILDE-Q and MSE show marginal performance, 2) case to prove that TILDE-Q is scalable for the complex problem, 3) case to visually investigate superiority of TILDE-Q for periodic and noisy dataset, and 4) when the data have no obvious periodicity. For more visualization, and the experimental results, please refer to the Anonymous GitHub<sup>1</sup>.

### C.2.1 COMPARISON WITH MSE AND TILDE-Q

In some cases, including FEDformer model with ETTh2 dataset, TILDE-Q and MSE have marginal MSE performance, as shown in Fig. 4. In these cases, MSE and TILDE-Q have shown almost identical behavior, indicating that TILDE-Q’s performance is at least comparable to that of MSE.

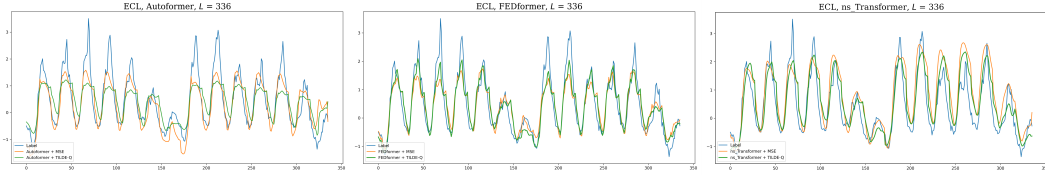

Figure 4: Qualitative results with ECL dataset for Autoformer (left), FEDformer (middle), and NSformer (right). Green line is trained with TILDE-Q and blue line is trained with MSE

### C.2.2 USING TILDE-Q TO BOOST MODEL SCALABILITY

In the cases of NBeats, Informer, and even NSformer (Liu et al., 2022), we have found that TILDE-Q is the best methods for model to have better interpretation of dataset, as shown in Fig. 5. These showcases reveal the importance of shape-awareness, especially for a dataset that is hard to predict. For NBeats and Informer, especially for the long-term forecasting (e.g., 720-Output), TILDE-Q shows its superiority in terms of shape-awareness and noise-robustness. For NSformer, TILDE-Q captures peaks and plateaus better than MSE, which is crucial for real-world problem, such as electricity usage. In case of Informer (middle), MSE and TILDE-Q make informative predictions on the 336-Output

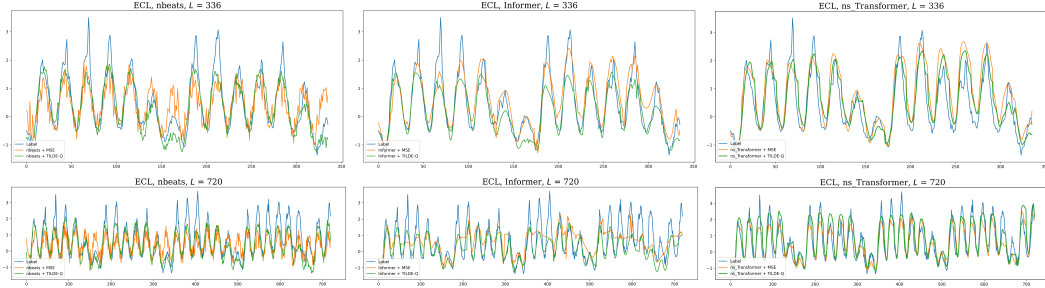

Figure 5: Qualitative results with NBeats (left), Informer (middle), and NSformer (right)

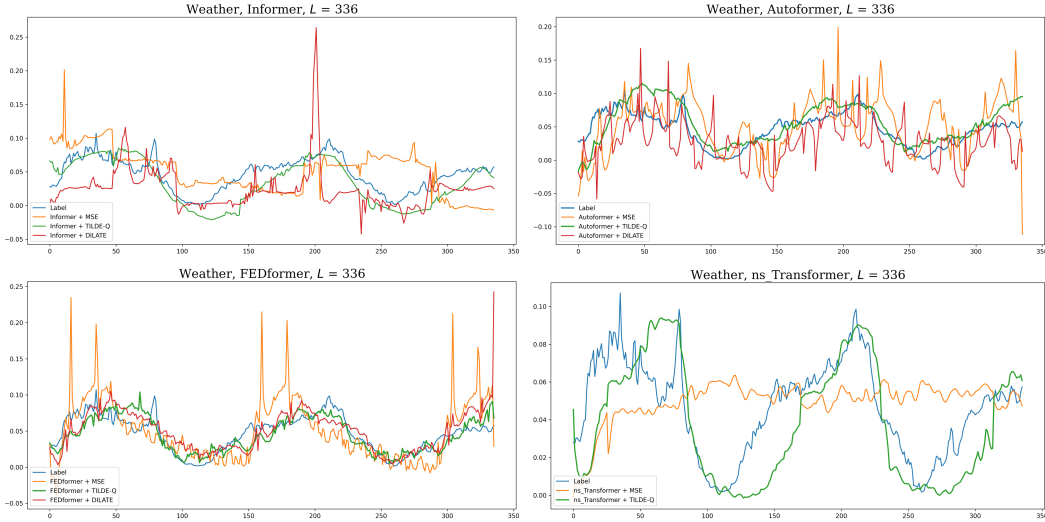

Figure 6: Qualitative results with Weather dataset for Informer (top-left), Autoformer (top-right), FEDformer (bottom-left), and NSformer (bottom-right)

setting, but on the 720-Output setting, the model trained with MSE lost its ability to be aware of the shape, resulting in uninformative output.

### C.2.3 PERIODIC AND NOISY DATASET SHOWCASES

Because of its noisy characteristics, most models have struggled to recognize the periodicity of the Weather dataset, resulting in performance degradation. This section will provide qualitative examples from the Weather dataset. In the Weather dataset, we observed that it has periodic behavior with large fluctuations and high noises. This fluctuation makes the model mislead the periodicity of dataset, even when we could visually identify it. As shown in Fig. 6, compared to MSE and DILATE, TILDE-Q helps the model properly forecast the future value, preserving important features such as plateau, peak, and periodicity with less noise. On the other hand, in the cases of MSE and DILATE, they have less effective or no strategy for handling the shape and distortion, yielding uninformative and noisy forecasting results.

### C.2.4 PERFORMANCE ON DATA WITHOUT PERIODICITY

Although effective, TILDE-Q and the existing metrics still face limitations when predicting data without obvious periodicity and with rapid fluctuations. One representative example is the Exchange dataset, which inherently has no obvious periodicity, like other economics datasets. However, the results with TILDE-Q and NSformer provide insight for a possible future improvement through its temporal feature modeling with a large gap (i.e., amplitude shifting), as bottom-right part of Fig. 7.

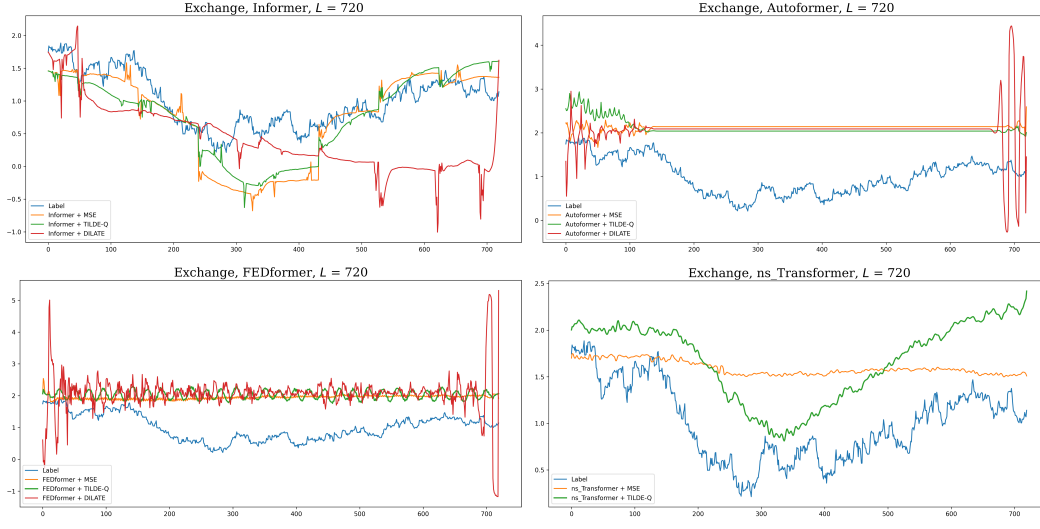

Figure 7: Qualitative results with Exchange dataset for Informer (top-left), Autoformer (top-right), FEDformer (bottom-left), and NSformer (bottom-right)

### C.3 ABLATION STUDY

To evaluate the effect of the  $\alpha$ ,  $\gamma$ , and measure the effect of each loss function, we conduct a set of experiments with the ETTh2 dataset and N-Beats on the long-term forecasting problem. As we can see in Fig. 8, the model tends to predict amplification-free forecasting when  $\alpha$  increases. These results indicate our motivation, “ $\mathcal{L}_{a.shift}$  will return the forecasting results with same standard deviation with timely manner but without consideration of proper average value.”

Furthermore, in the top of Fig. 9, we can observe three things: (1) if we utilize  $\mathcal{L}_{a.shift}$  only, as we intended, it has a different average (-1.19 vs. 0.11) but relatively similar standard deviation (0.408 vs. 0.299); (2) In the case of  $\mathcal{L}_{phase}$  only, they can capture dominant frequency and produce relatively less-noisy forecasting; (3)  $\mathcal{L}_{amp}$  have relatively similar average value (-1.195 vs. -0.319), but it has far different standard deviation (0.408 vs. 8.592). In contrast, forecasting results of the model trained with MSE is very noisy and hard to interpret (Fig. 9, bottom). Note that we normalized the results in Fig. 9 because of the scale issue.

In Table 8, we provide how model performances vary with respect to hyperparameters of TILDE-Q. For the default setting, we utilized  $\alpha = 0.5, \gamma = 0.01$ . Because the design of TILDE-Q mainly focuses on shape modeling, we can see that DTW and LCSS are not critically changing for the hyperparameter. But their trade-offs are revealed in the MSE and TDI. For example, when we decrease  $\alpha$ , we can observe TDI increases. It indicates the trade-offs of phase shifting invariance, which has tolerance for non-timely forecasting. Also, we can see that increasing  $\alpha$  or  $\gamma$  affects the MSE. When we have  $\alpha = 1$ , we have no  $\mathcal{L}_{phase}$  and less penalty for the statistical differences, and its absence causes the high MSE, as we can see in Fig. 8.  $\gamma$  also affects the MSE, but  $\mathcal{L}_{phase}$  reduces  $\mathcal{L}_{amp}$ ’s side effect.

Table 8: Ablation study on with ETTh2,  $L = 720$ , and N-Beats

| Metric | Default        | $\gamma = 0.1$ | $\gamma = 0.5$ | $\gamma = 1.0$ | $\alpha = 0.0$ | $\alpha = 0.1$ | $\alpha = 0.8$ | $\alpha = 1.0$ | $\mathcal{L}_{a.shift}$ only | $\mathcal{L}_{phase}$ only | $\mathcal{L}_{amp}$ only |
|--------|----------------|----------------|----------------|----------------|----------------|----------------|----------------|----------------|------------------------------|----------------------------|--------------------------|
| MSE    | 0.3005         | 0.2968         | 0.3083         | 0.3168         | 0.3075         | 0.3161         | <b>0.2872</b>  | 1.1752         | 1.5123                       | 0.3391                     | 1.8453                   |
| DTW    | <b>17.5154</b> | 17.5265        | 17.5649        | 17.7302        | 17.7564        | 17.5931        | 17.6508        | 17.6886        | 17.7261                      | 17.848                     | 18.0261                  |
| TDI    | 9.2197         | 9.1303         | 9.2261         | 9.4366         | 10.3550        | 9.8957         | <b>8.4725</b>  | 8.7118         | 10.2519                      | 12.8568                    | 10.5602                  |
| LCSS   | 0.5382         | 0.5366         | 0.5277         | 0.5137         | 0.5050         | 0.5137         | <b>0.5584</b>  | 0.5445         | 0.5341                       | 0.4920                     | 0.5086                   |



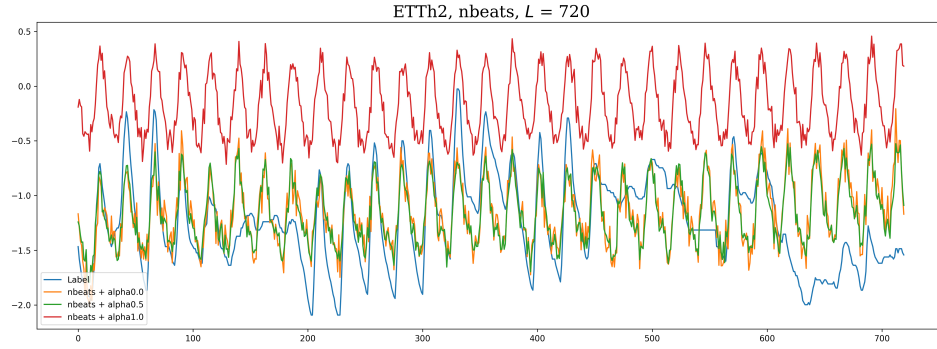Figure 8: Ablation study result visualization with different  $\alpha$  on ETTh2 dataset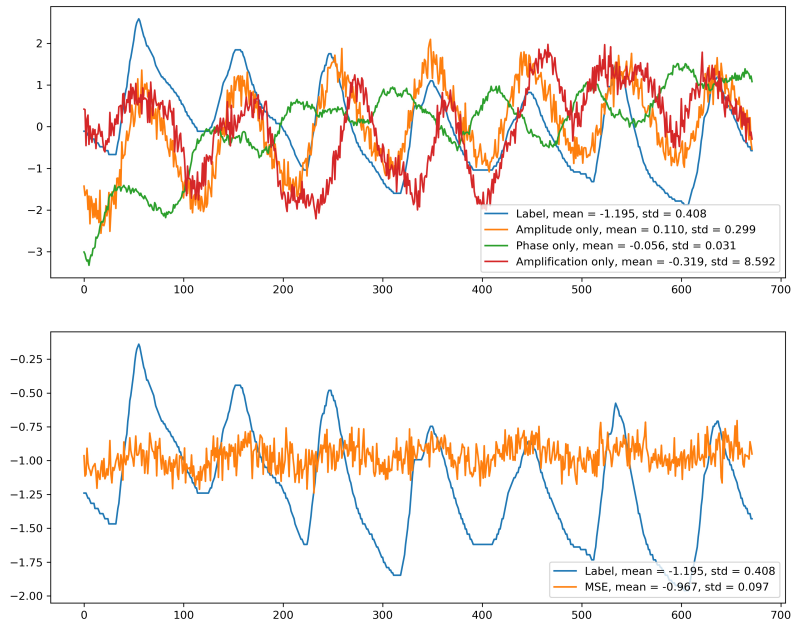

Figure 9: Ablation study result visualization of three proposed loss function on ETTh2 dataset
